# Supplementary material for: Attenuated Codon Optimality Contributes to Neural-Specific mRNA Decay in Drosophila
Source: PubMed Central journal article supplement — Cell Rep. Author manuscript; Available in PMC 2018 Oct 3. (PMC6169788; doi:10.1016/j.celrep.2018.07.039), 2018-08-14
Supplement: NIHMS1505032-supplement-1.pdf [file NIHMS1505032-supplement-1.pdf]

Cell Reports, Volume 24

## Supplemental Information

### **Attenuated Codon Optimality Contributes to Neural-Specific mRNA Decay in *Drosophila***

**Dana A. Burow, Sophie Martin, Jade F. Quail, Najwa Alhusaini, Jeff Coller, and Michael D. Cleary**

### Sequence Feature Odds Ratio

freq. in mRNAs less stable in nervous system / freq. in mRNAs with no difference in stability ( $\log_2$ )

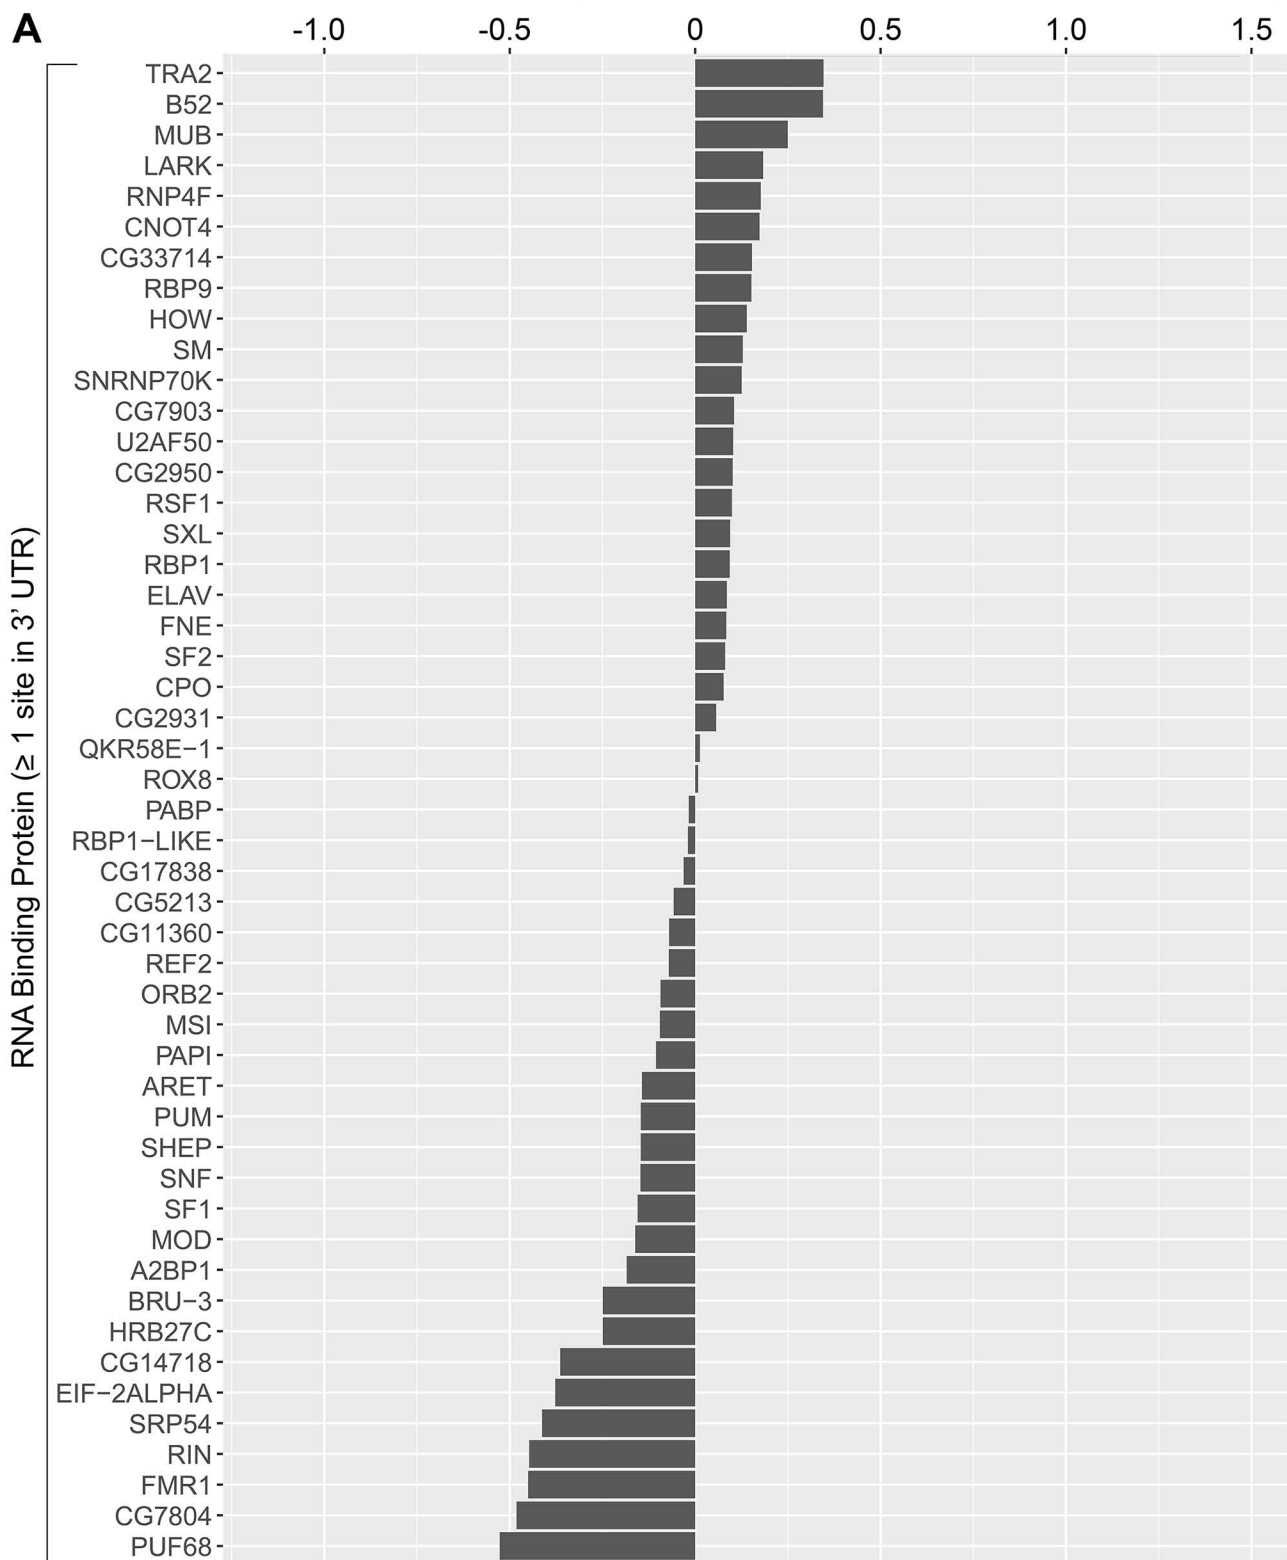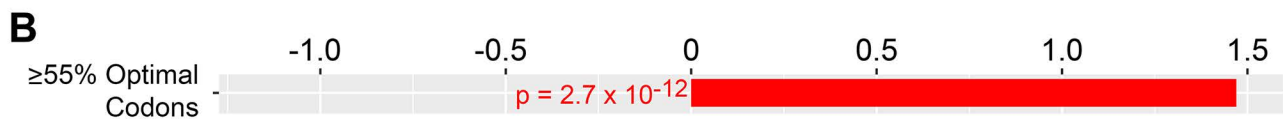

**Supplemental Figure S1. Sequence feature enrichment or depletion among mRNAs that are less stable in the nervous system. Related to Figure 1. A.** Enrichment or depletion of RNA-binding protein sites in mRNAs with shorter half-life in the nervous system. RBPmap (Paz et al., 2014) was used to identify RNA-binding protein (RBP) sites in the 3' UTR of 331 mRNAs with  $\geq 1.5$ -fold decreased stability in the nervous system and 1,658 mRNAs with no difference in stability (neural / whole embryo half-life ratio between 0.75 and 1.25). RBP binding site frequencies in each group of mRNAs were used to calculate the odds ratio. Significance was tested using Fisher's Exact Test and no RBPs showed significant enrichment or depletion. **B.** Odds ratio analysis as described in part A using optimal codon content  $\geq 55\%$  as a sequence feature.

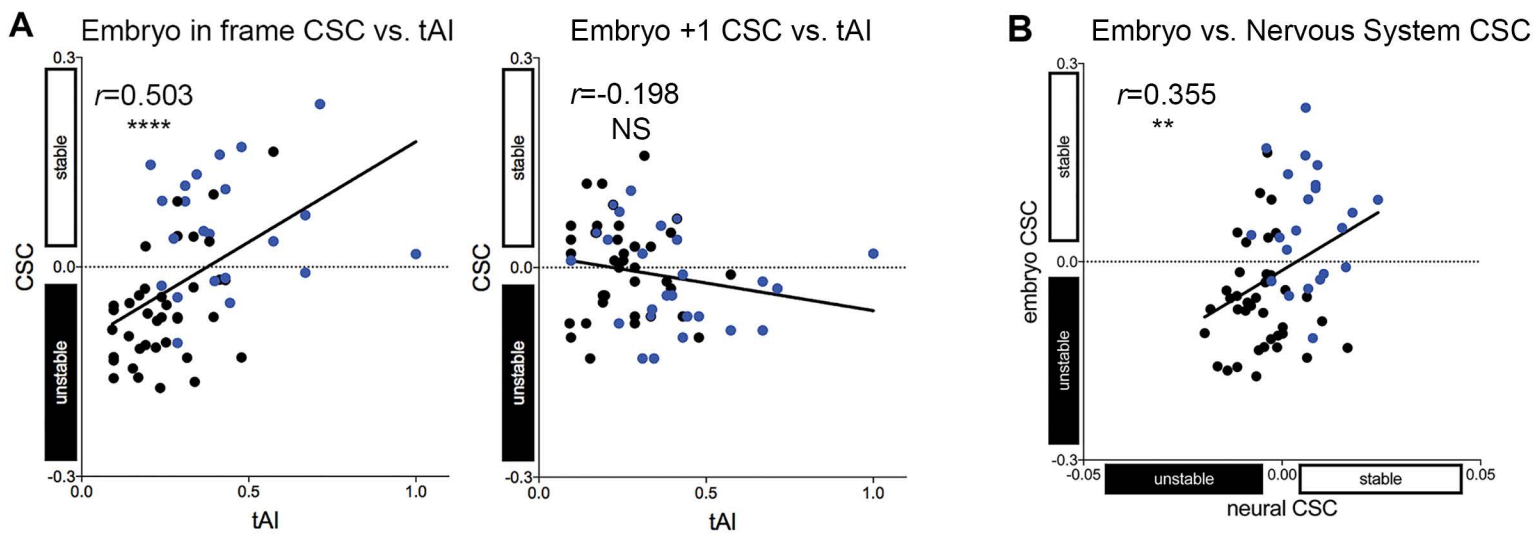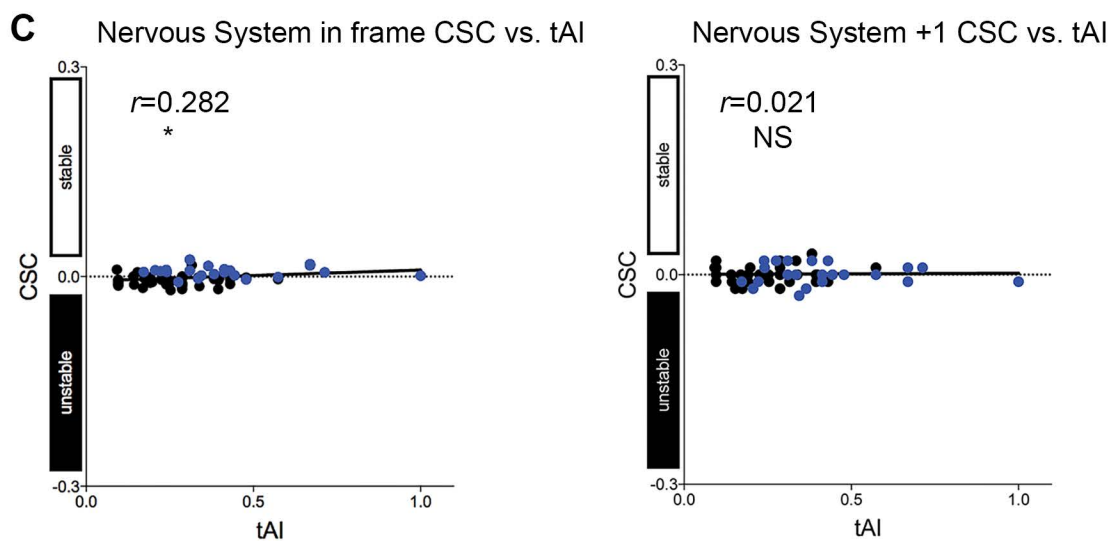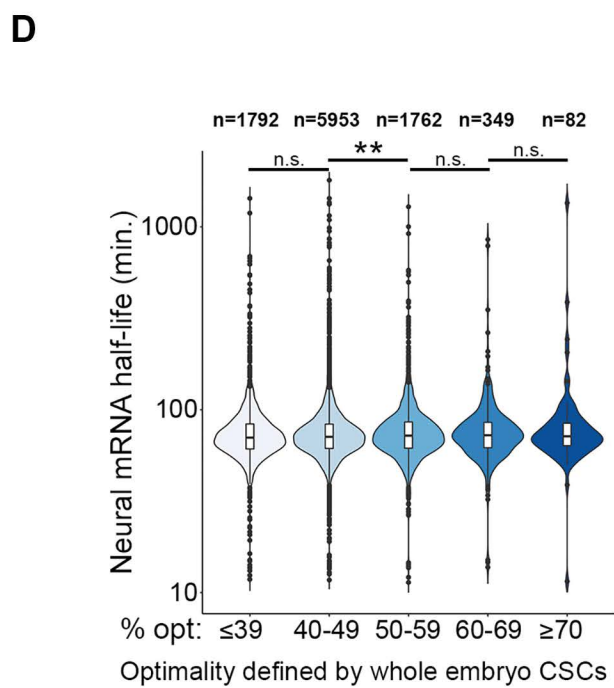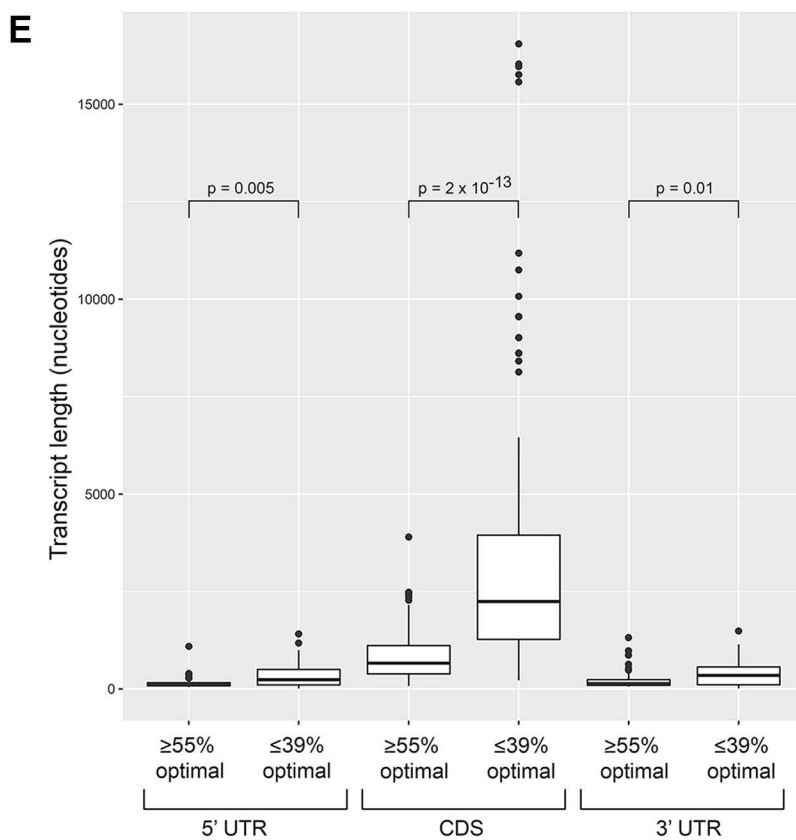

**Supplemental Figure S2. Correlations between CSC, tAI, transcript stability and transcript length. Related to Figures 1 and 2.** **A.** Correlations based on whole embryo mRNA decay measurements. Left panel: in frame CSC. Right panel: +1 frameshifted CSC. **B.** Correlation between whole embryo CSCs and neural-specific CSCs. **C.** Correlations based on neural-specific mRNA decay measurements (as in part A). Pearson  $r$  values are listed. \*\*\*\* indicates  $p < 0.0001$ , \*\* indicates  $p < 0.001$ , \* indicates  $p < 0.01$ , NS indicates no significant correlation. Predicted preferred codons are indicated as blue dots. **D.** Neural-specific half-life of mRNAs binned according to optimal codon content (% opt) as defined by whole embryo CSC calculations. Significant differences among categories were detected by Kruskal-Wallis test and p-values (\*\*  $< 0.001$  or no significant difference (n.s.)) for the indicated pairwise comparisons are based on Dunn's test. **E.** 5' UTR, coding sequence (CDS), and 3' UTR lengths were compared for all mRNAs present in the neural-specific and whole embryo datasets with  $\geq 55\%$  optimal codon content and  $\leq 39\%$  optimal codon content. Significance was determined using Kruskal-Wallis followed by Dunn's test to calculate p-values.

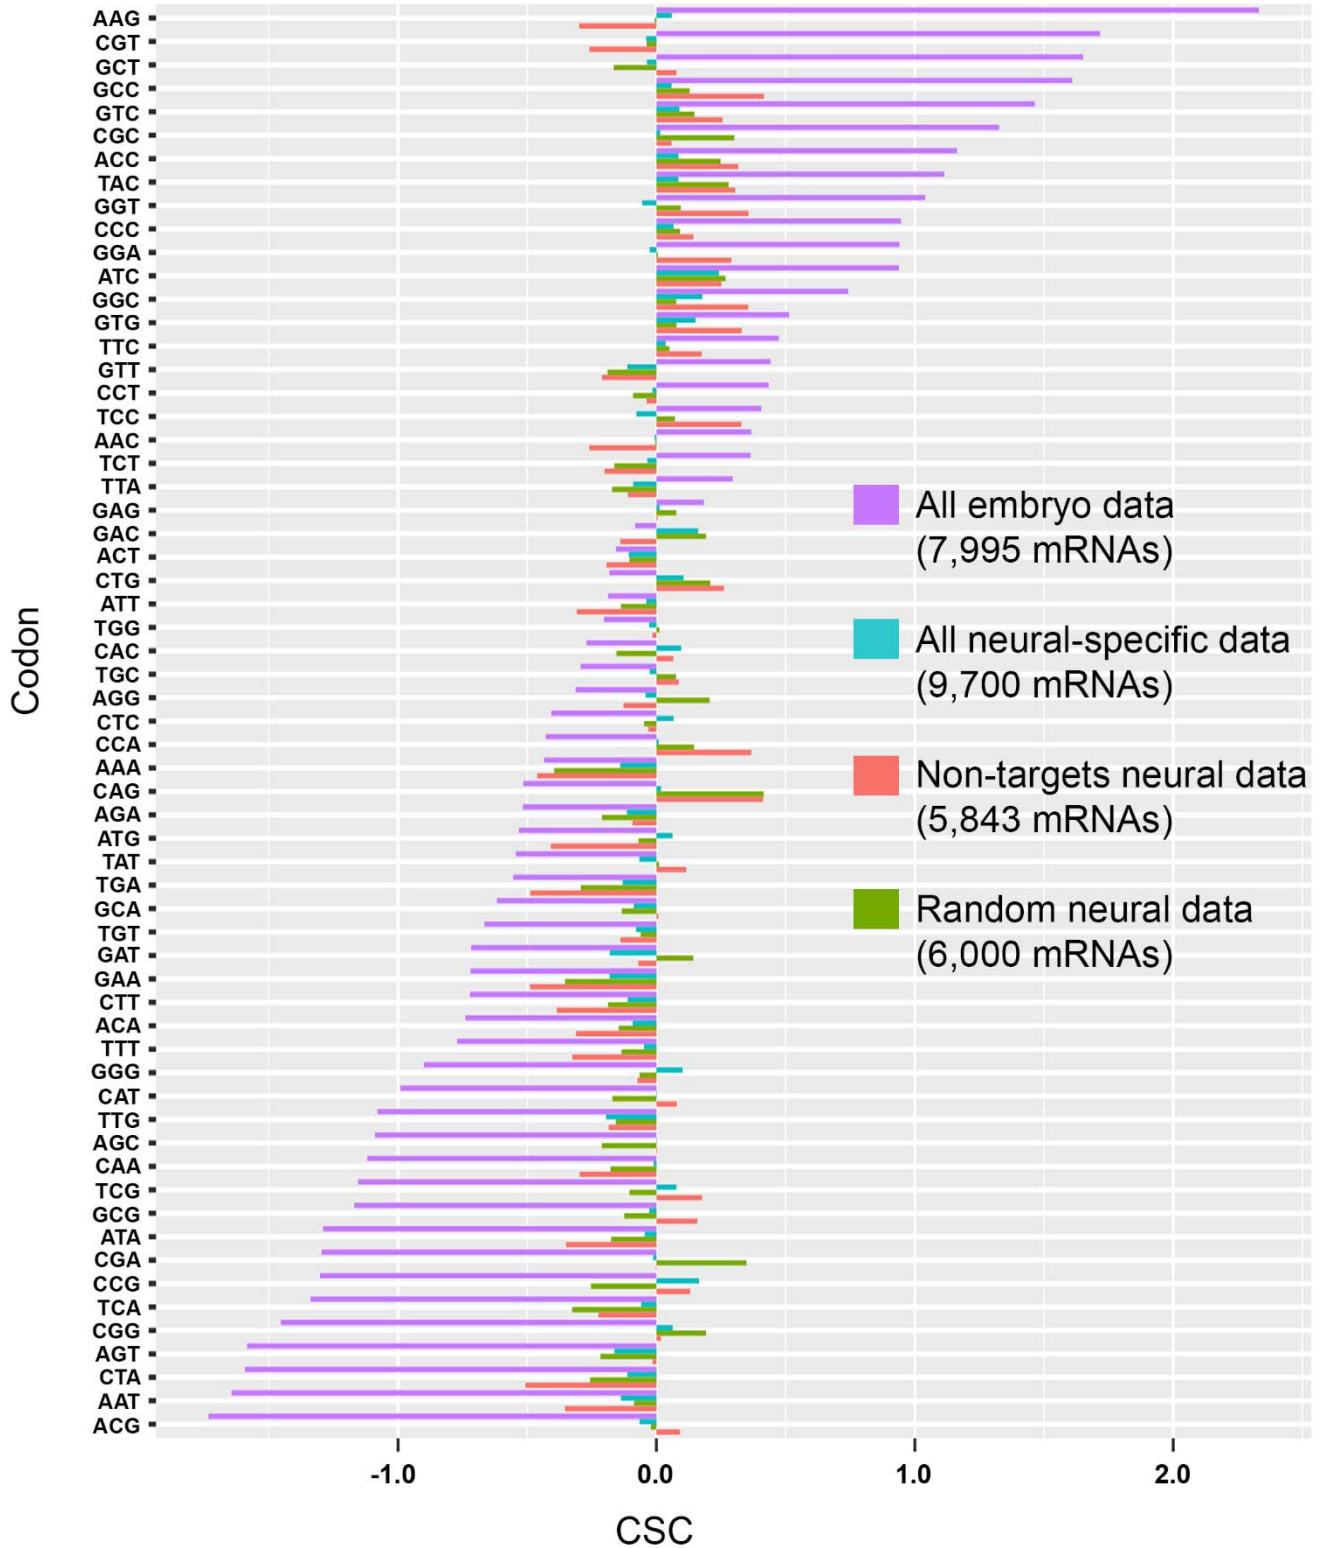

**Supplemental Figure S3. “Non-target” CSC calculations. Related to Figure 1.** CSC calculations based on whole embryo data, neural-specific data, neural data that excludes all predicted targets of Pumilio, Fmrp, Orb2B, miR-124 and miR-315 (non-targets), and a random set of genes selected from the neural data.
